# Supplementary material
Source: MDPI journal article supplement (https://www.mdpi.com/1424-8247/16/10/1483)

## Supporting Information

# Design, synthesis, and biological evaluation of novel N-arylpiperazines containing a 4,5 dihydrothiazole ring.

Giorgia Andreozzi<sup>1</sup>, Maria Rosaria Ambrosio<sup>2</sup>, Elisa Magli<sup>1</sup>, Giovanni Maneli<sup>4</sup>, Beatrice Severino<sup>1</sup>, Angela Corvino<sup>1</sup>, Rosa Sparaco<sup>1</sup>, Elisa Perissutti<sup>1</sup>, Francesco Frecentese<sup>1</sup>, Vincenzo Santagada<sup>1</sup>, Anna Lesniak<sup>5</sup>, Magdalena Bujalska-Zadrozny<sup>5</sup>, Giuseppe Caliando<sup>1</sup>, Pietro Formisano<sup>2,4</sup> and Ferdinando Fiorino<sup>1\*</sup>

<sup>1</sup>Dipartimento di Farmacia Università di Napoli Federico II Via D. Montesano, 49, 80131, Naples, Italy

<sup>2</sup>URT "Genomic of Diabetes", Institute for Experimental Endocrinology and Oncology "G. Salvatore", National Research Council (IEOS-CNR), Via Pansini 5, 80131 Naples, Italy

<sup>3</sup>Dipartimento di Sanità Pubblica Università di Napoli Federico II Via Pansini, 5, 80131, Naples, Italy

<sup>4</sup>Department of Translational Medicine, University of Naples "Federico II", Via Pansini 5, 80131 Naples, Italy.

<sup>5</sup>Department of Pharmacotherapy and Pharmaceutical Care, Centre for Preclinical Research and Technology, Faculty of Pharmacy, Medical University of Warsaw, 1 Banacha Str., 02-097 Warsaw, Poland

\*Correspondence: Corresponding author. Tel.: +39-81 679825; fax 39-81-678649; e-mail address: [fefiorin@unina.it](mailto:fefiorin@unina.it)

**Contents:  $^1\text{H}$  and  $^{13}\text{C}$  NMR spectra for 2a-2c, 3a-3c**

**Compound 2a**

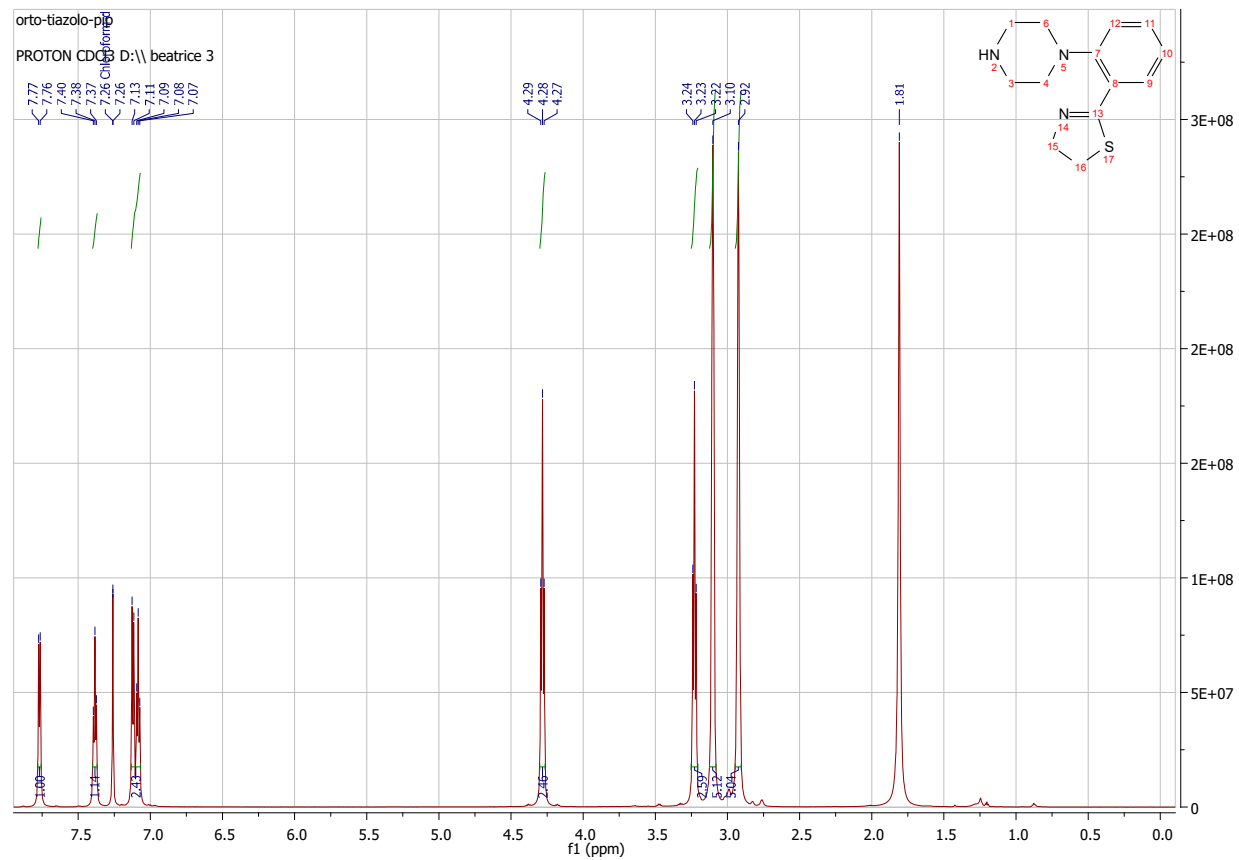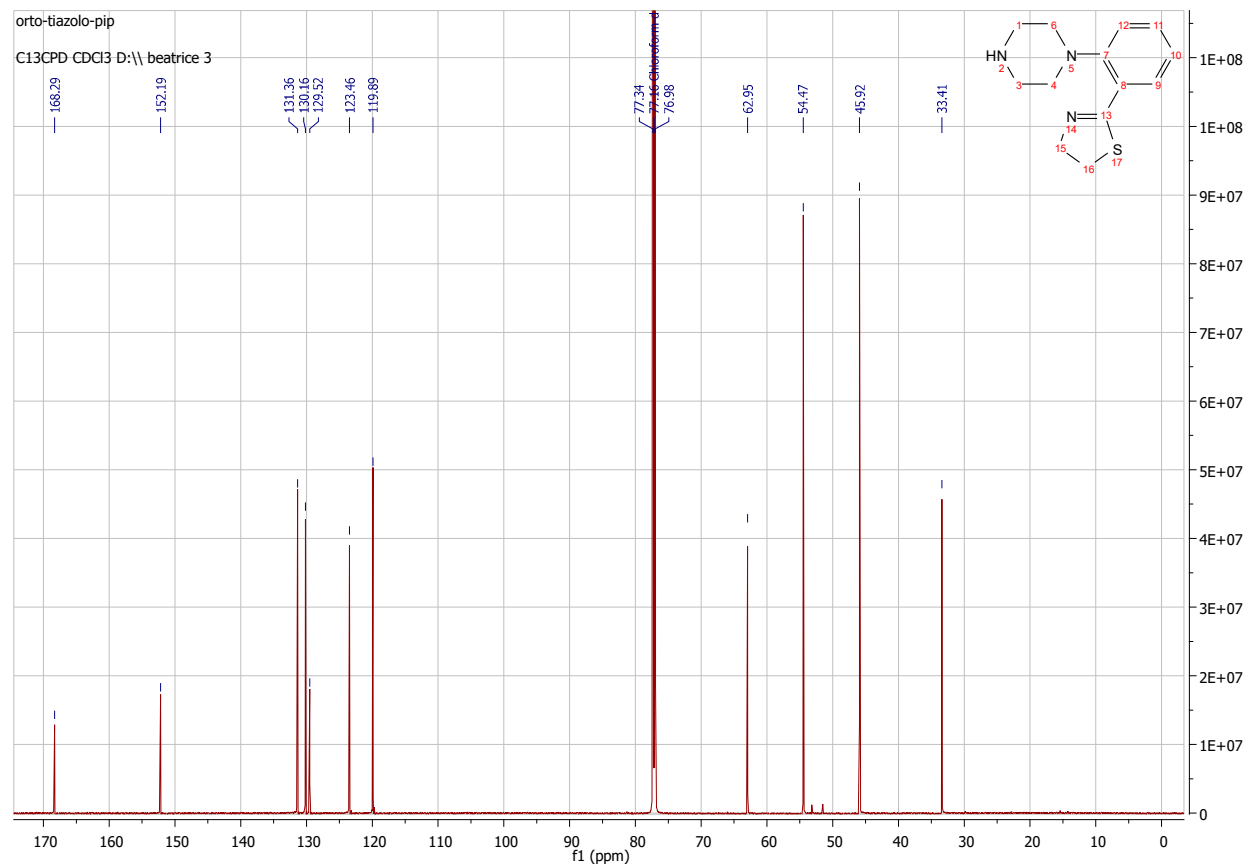

Compound 2b

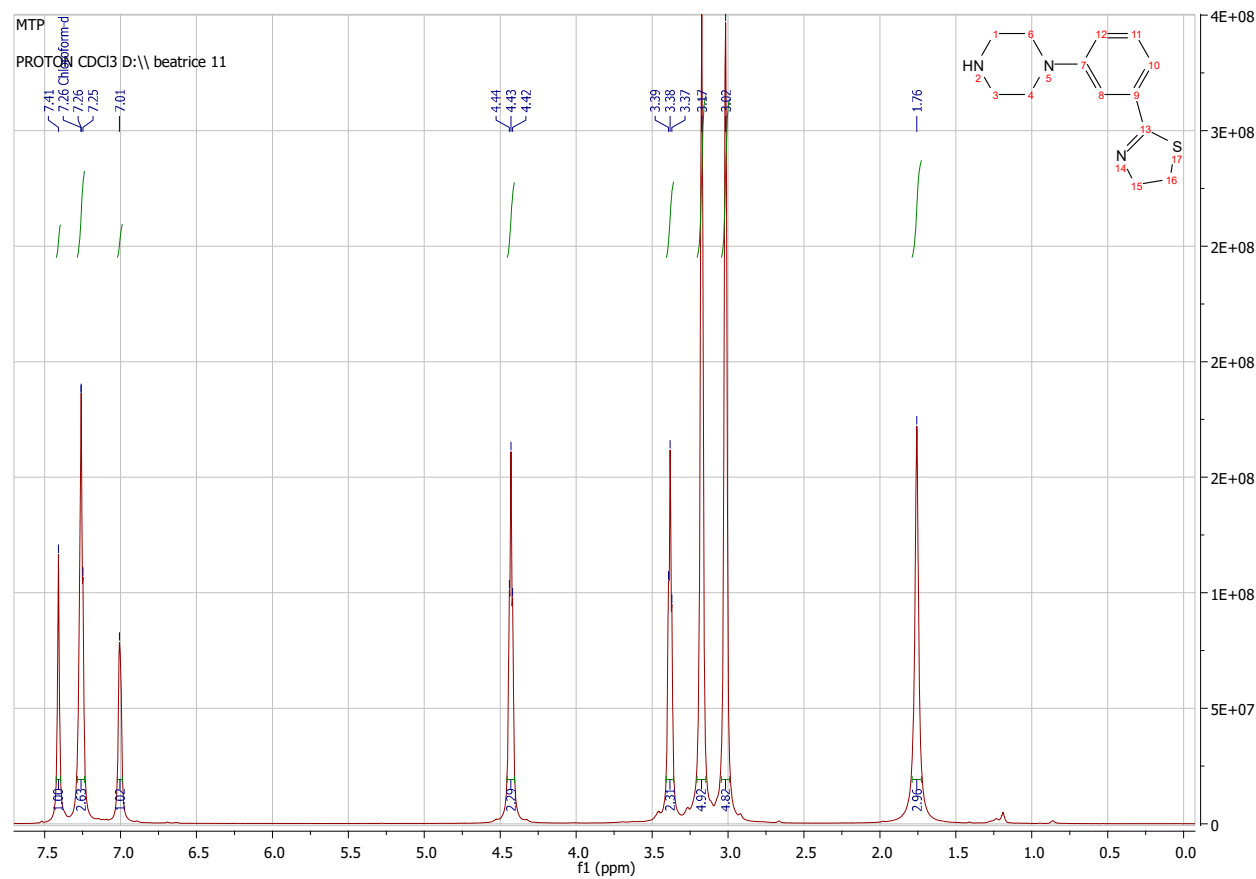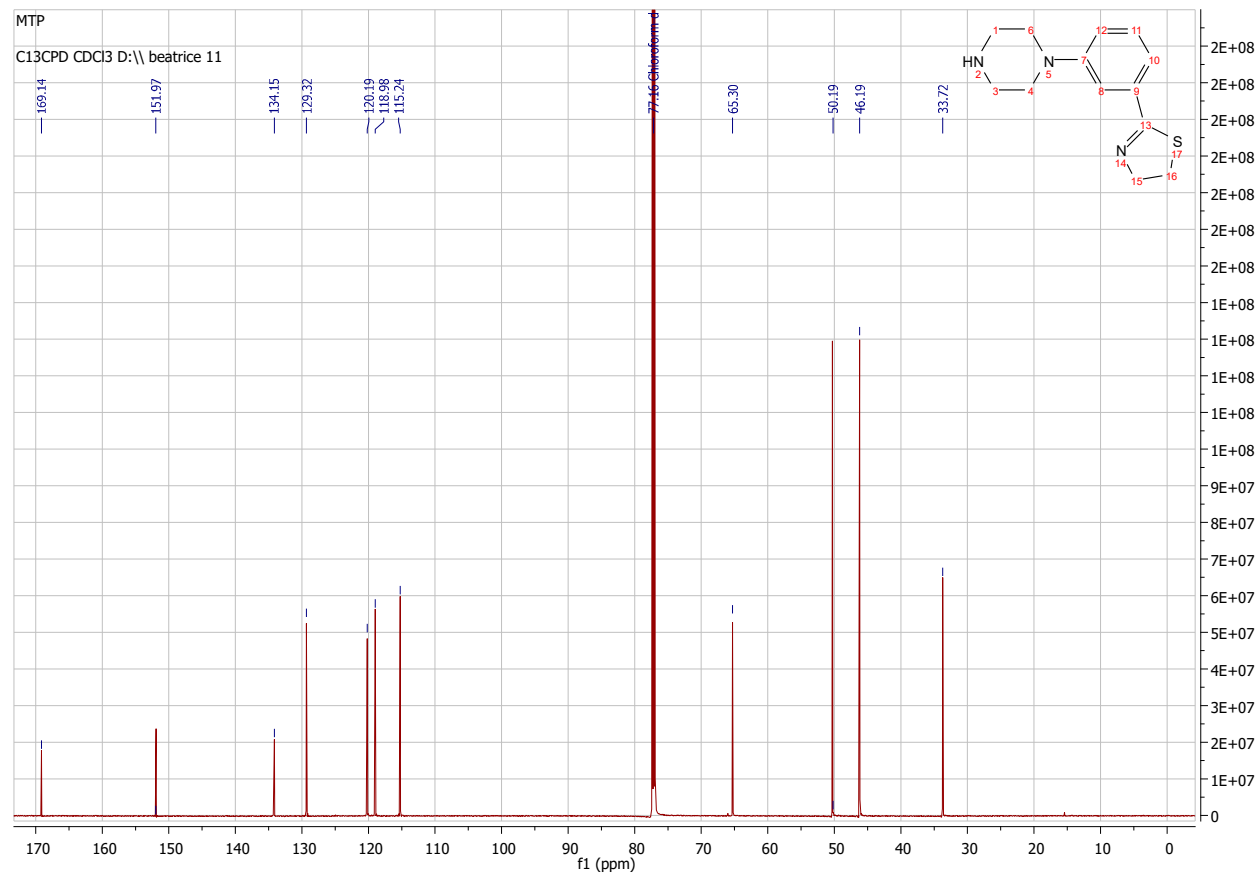

Compound 2c

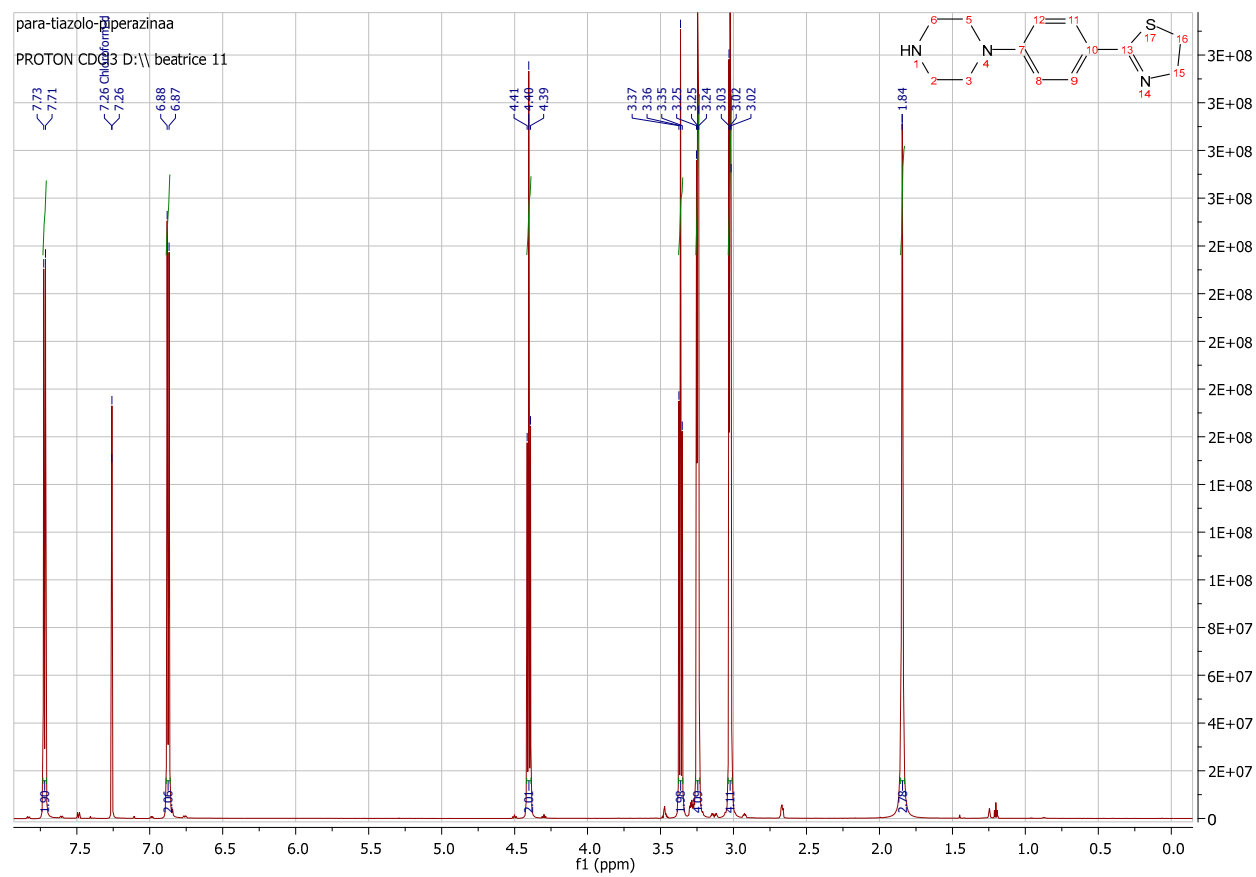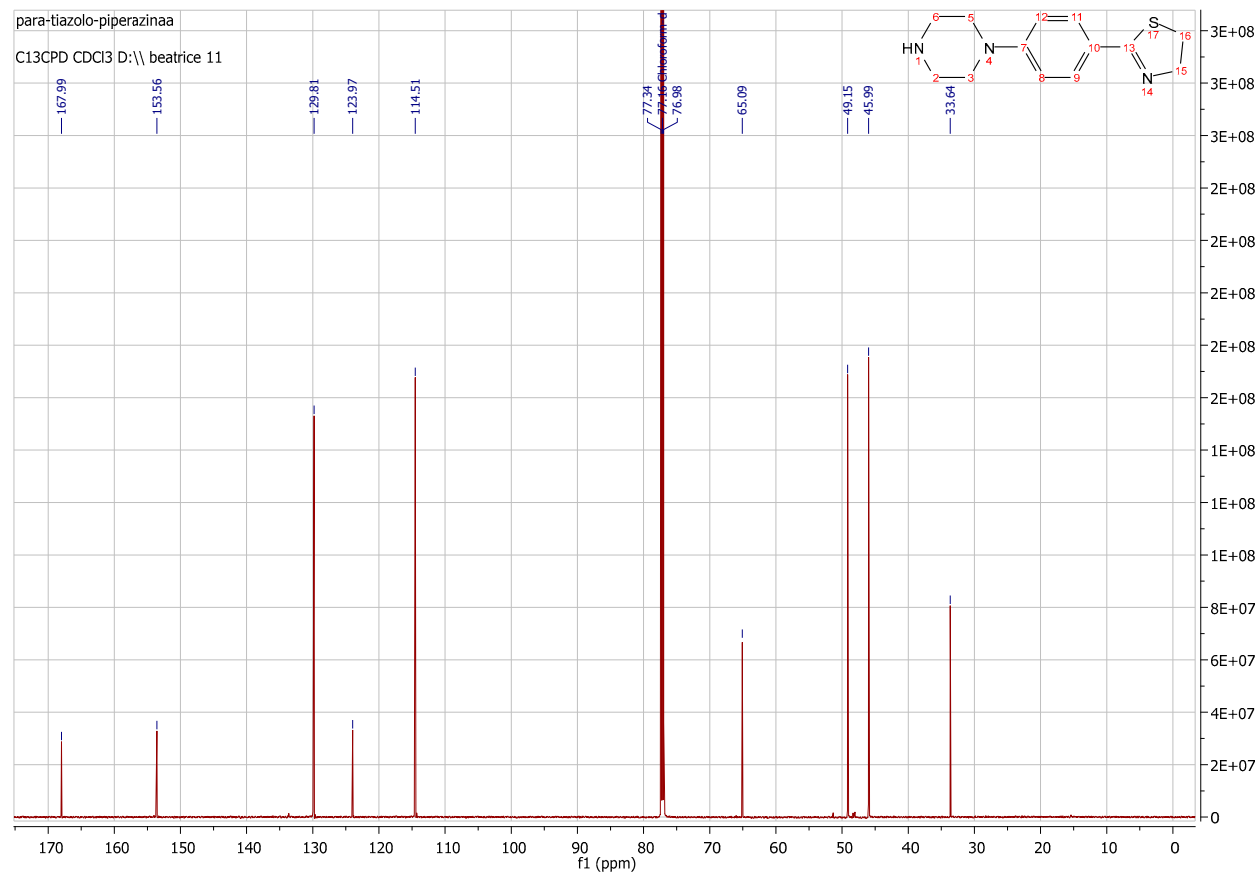

Compound 3a

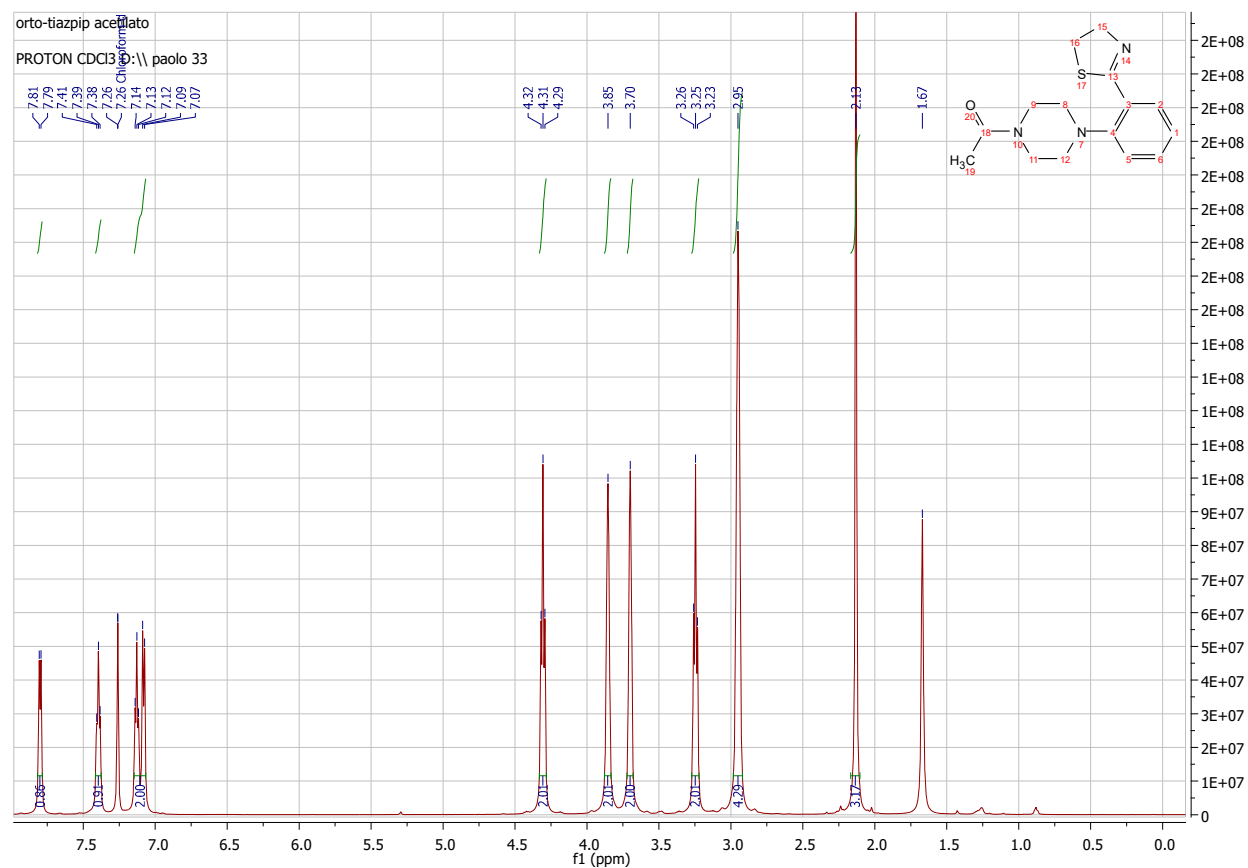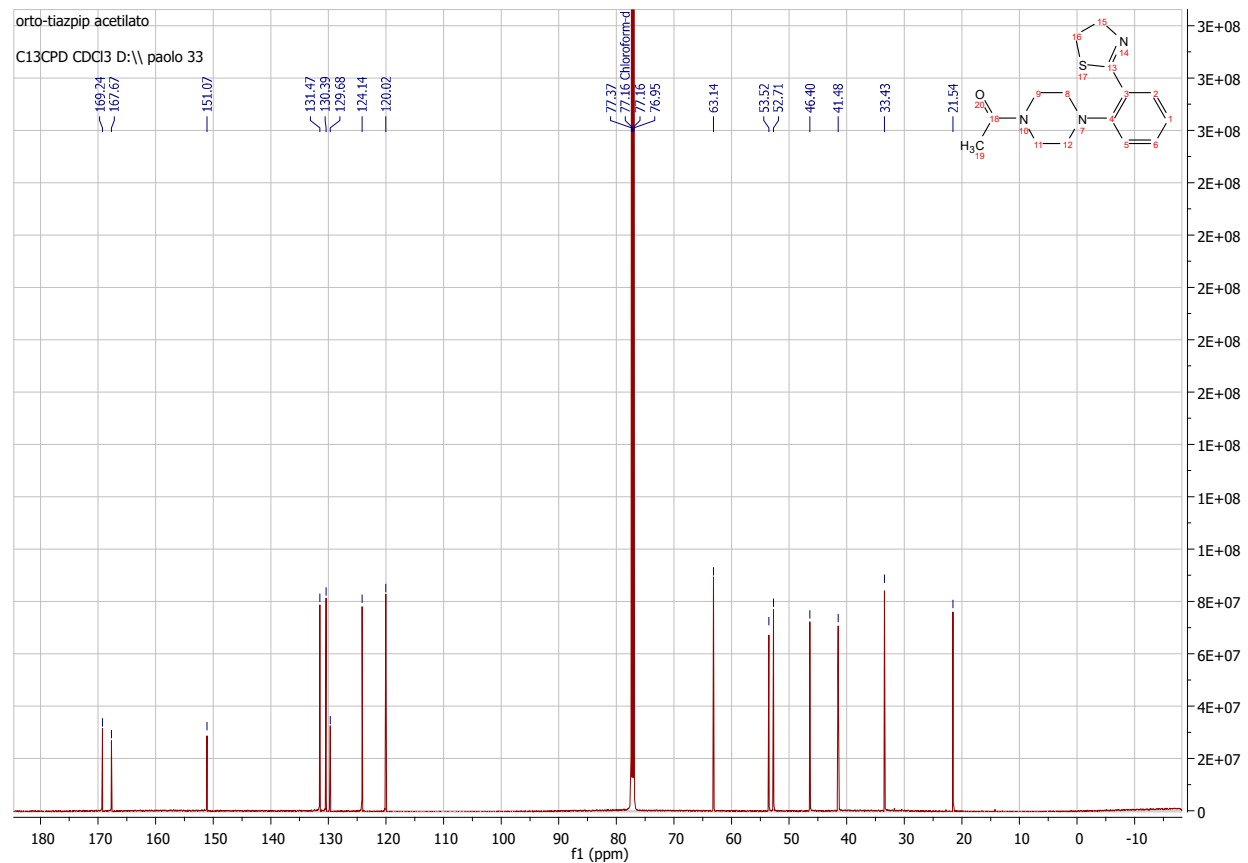

Compound 3b

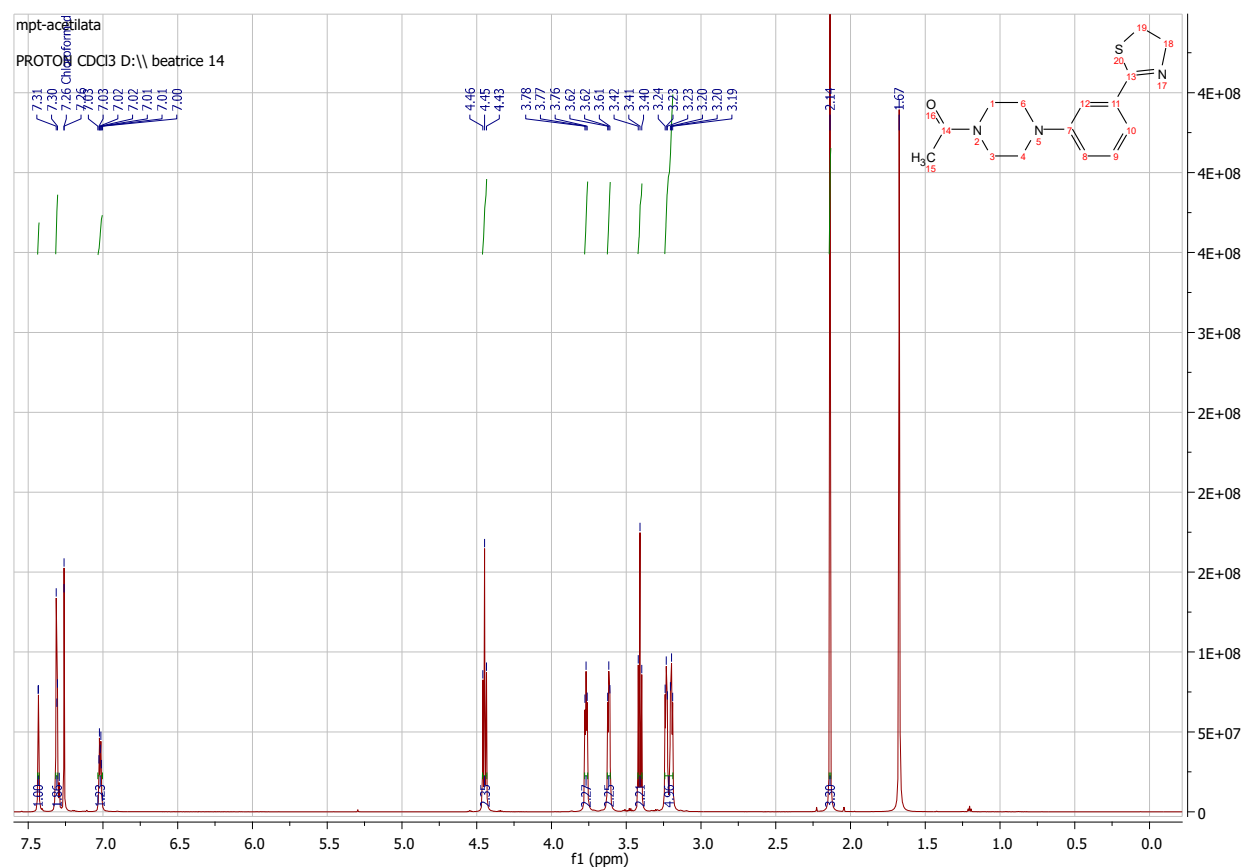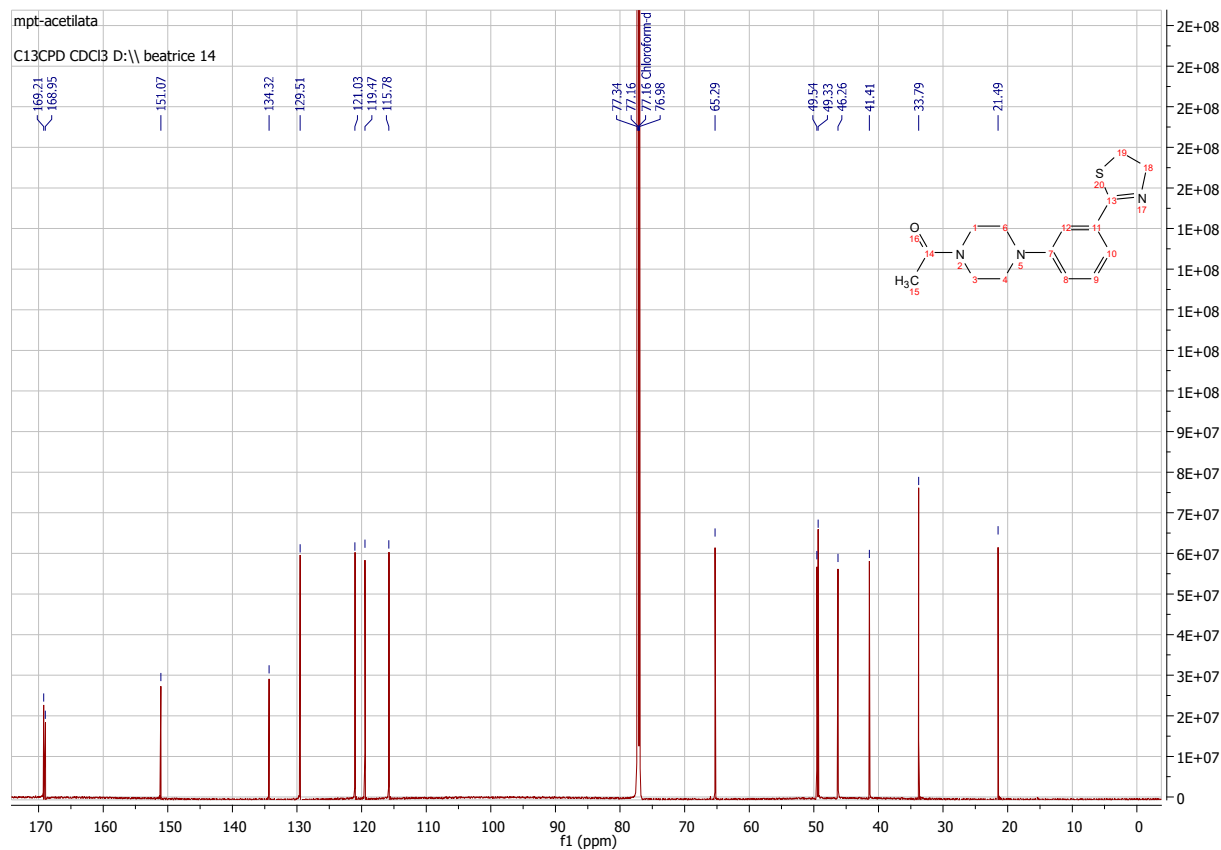

Compound 3c

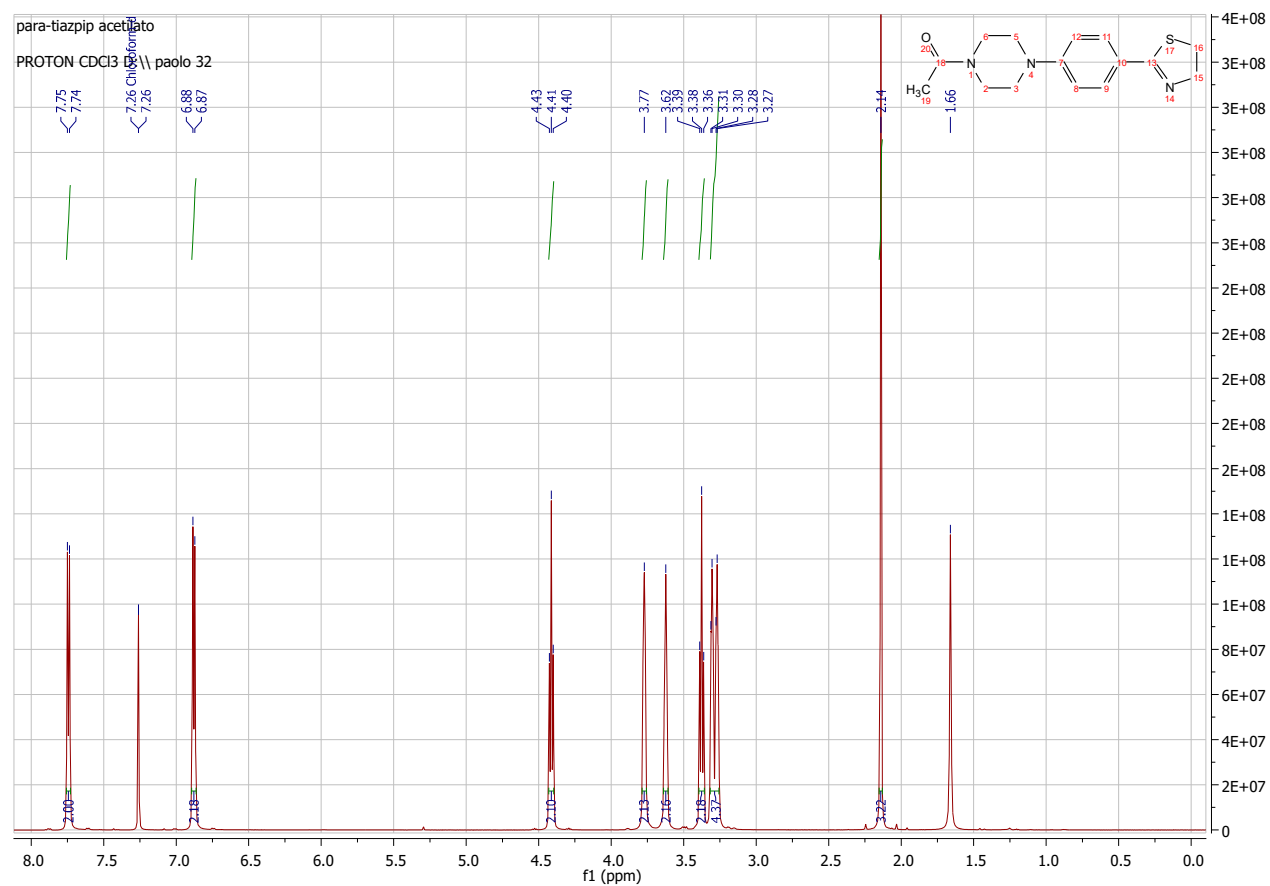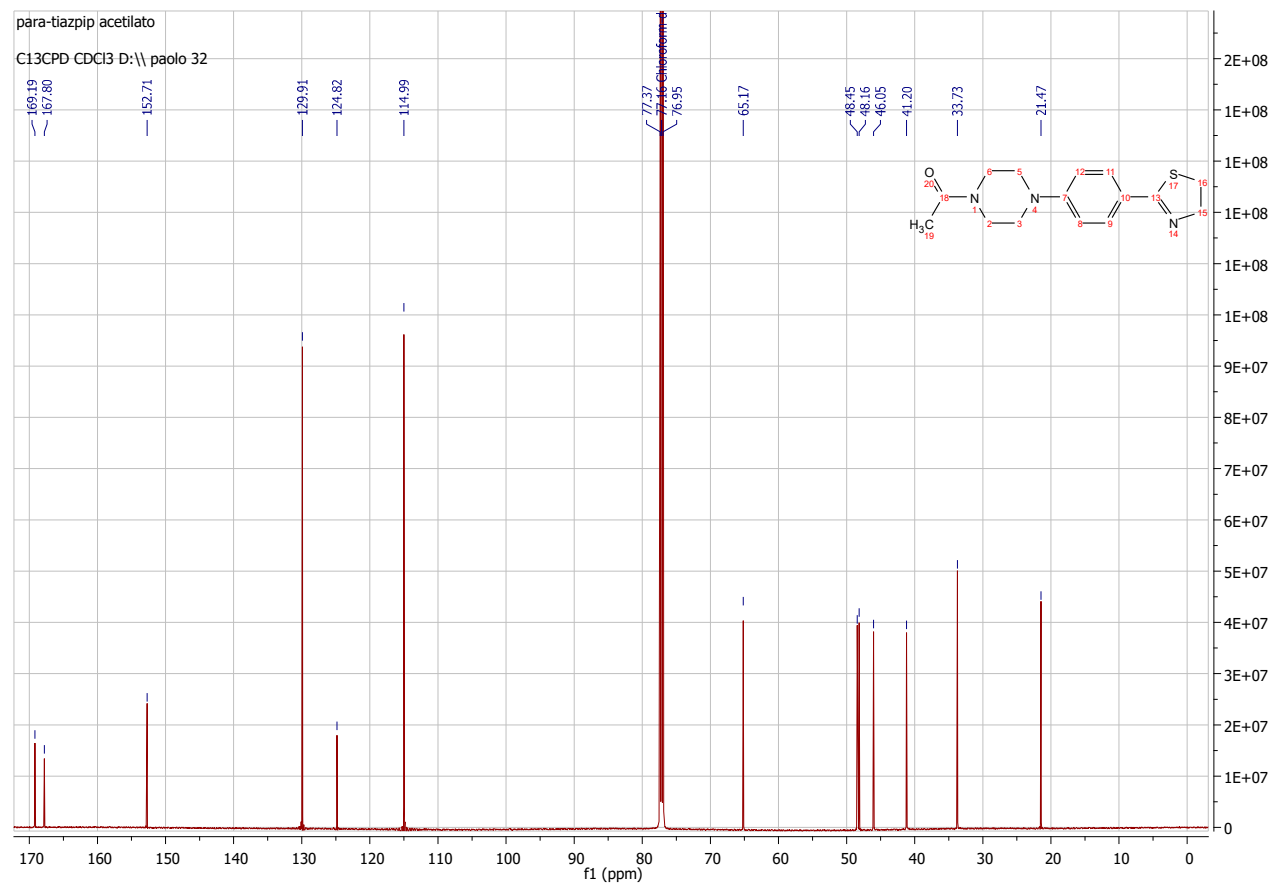

Supplement: s1 [file s1]
